# Supplementary material for: Children develop robust and sustained cross-reactive spike-specific immune responses to SARS-CoV-2 infection
Source: Springer Nature journal article supplement (doi:10.1038/s41590-021-01089-8), 2021-12-22
Supplement: MOESM1 [file 41590_2021_1089_MOESM1_ESM.pdf]

**Supplementary information**

---

**Children develop robust and sustained cross-reactive spike-specific immune responses to SARS-CoV-2 infection**

---

In the format provided by the authors and unedited

|                                    |                               | Children                     |                             | Adult                       |                             | Pre-COVID                 |                             |
|------------------------------------|-------------------------------|------------------------------|-----------------------------|-----------------------------|-----------------------------|---------------------------|-----------------------------|
|                                    |                               | Seropositive*                | Seronegative*               | Seropositive*               | Seronegative*               | Children                  | Adult                       |
| MSD serology <sup>1</sup>          | SARS-CoV-2 Spike              | 11589±4.097<br>(43/43)       | 57.43±2.178<br>(0/48)       | 8593±4.173<br>(91/91)       | 61.14 ±2.047<br>(0/63)      | 44.34±3.719<br>(0/9)      | 13.22±4.893<br>(0/50)       |
|                                    | SARS-CoV-2 Nucleoprotein      | 5914±3.735<br>(40/43, 93%)   | 160.4±3.625<br>(7/48, 15%)  | 5321±5.116<br>(85/90, 94%)  | 216.6±5.038<br>(17/63, 27%) | 68.71±2.764<br>(0/9)      | 76.238±6.238<br>(6/50, 12%) |
|                                    | SARS-CoV-2 RBD                | 4527±3.673<br>(40/43, 93%)   | 70.80±2.435<br>(1/48, 2%)   | 2845±4.755<br>(79/91, 87%)  | 106.0±2.604<br>(2/63, 5%)   | 49./68±3.496<br>(0/9)     | 6.085±4.865<br>(0/50)       |
|                                    | SARS-CoV-2 NTD                | 234.9±3.436<br>(41/43, 95%)  | 2.119±2.630<br>(1/47, 2%)   | 106.9±6.290<br>(79/91, 87%) | 2.271±3.265<br>(2/60, 3%)   | 1.757±4.179<br>(1/9, 11%) | 1.196±1.99<br>(0/11)        |
|                                    | OC43                          | 36938±2.780<br>(43)          | 19296±2.531<br>(48)         | 38644±2.151<br>(91)         | 30526±1.974<br>(63)         | n.a.                      |                             |
|                                    | HKU-1                         | 8014±2.346<br>(43)           | 3544±3.181<br>(48)          | 12810±2.402<br>(91)         | 9090±2.698<br>(63)          |                           |                             |
|                                    | NL63                          | 2861±2.482<br>(43)           | 1899±2.599<br>(48)          | 3112±1.914<br>(91)          | 2643±2.304<br>(63)          |                           |                             |
|                                    | 229e                          | 11327±5.498<br>(43)          | 4845±6.982<br>(48)          | 22822±2.273<br>(91)         | 17032±2.951<br>(63)         |                           |                             |
| ELISpot <sup>2</sup>               | Spike (S1+S2)                 | 532.9±591.0<br>(32/37, 86%)  | 212.7±242.6<br>(12/20, 60%) | 195.0±280.7<br>(45/64, 69%) | 111.7±244.1<br>(10/29, 34%) |                           |                             |
|                                    | N/M                           | 33.81±43.27<br>(16/37, 44%)  | 4.172±8.574<br>(2/20, 10%)  | 75.91±147.9<br>(40/64, 63%) | 19.59±83.46<br>(2/29, 7%)   |                           |                             |
|                                    | Flu                           | 110.0±160.9<br>(37)          | 159.2±243.0<br>(18)         | 147.6±369.9<br>(52)         | 164.4±275.1<br>(24)         |                           |                             |
| <b>+6mth Infection<sup>3</sup></b> |                               |                              |                             |                             |                             |                           |                             |
| MSD serology                       | SARS-CoV-2 Spike              | 11450±4.428<br>(34/35, 97%)  | n.d.                        | 6102±7.131<br>(73/81, 90%)  | n.a.                        | n.a.                      |                             |
|                                    | SARS-CoV-2 Nucleoprotein      | 6086±2.26<br>(35/35, 100%)   |                             | 4611±5.45<br>(75/81, 93%)   |                             |                           |                             |
|                                    | SARS-CoV-2 RBD                | 4366±(3.624)<br>(33/35, 94%) |                             | 2482±5.029<br>(69/81, 85%)  |                             |                           |                             |
| ELISpot                            | Spike (S1+S2)                 | 530.8±600.7<br>(23/27, 85%)  |                             | 176.1±228.9<br>(37/52, 71%) |                             |                           |                             |
|                                    | N/M                           | 35.41±42.51<br>(12/27, 44%)  |                             | 86.44±161.7<br>(35/52, 67%) |                             |                           |                             |
|                                    | Neutralising antibody (ng/ml) | 278.9±1.485<br>(12)          |                             | 247.4±1.608<br>(15)         |                             | n.a.                      | n.d. (10)                   |

**Supplementary Table 1. Immunological Characteristics of Seropositive and Seronegative Children and Adults.** MSD serology data is presented as Geometric mean ±SD (AU/ml), ELISpot data is presented as mean±SD (sfc/10<sup>6</sup> PBMC). \*Seropositive/negative defined by 1. MSD-anti-spike titre, 2. MSD-anti-Spike or prior PHE seropositive or total IgG/A/M anti-spike ELISA. 3. PHE sKIDS prior positive (June-July 2020). N.d. – not detected.

|              |     | ELISpot (sfc/10 <sup>6</sup> PBMC) |            |      | MSD Serology – AU/ml |           |           |                   |               |              |             |              |               |               |               |
|--------------|-----|------------------------------------|------------|------|----------------------|-----------|-----------|-------------------|---------------|--------------|-------------|--------------|---------------|---------------|---------------|
| Adult /Child | Age | Spike                              | N/M        | Flu  | COV-2-Spike          | COV-2-RBD | COV-2-NTD | COV2-Nucleocapsid | OC43 Spike    | HKU-1 Spike  | NL63 Spike  | 229e Spike   | sKIDS round 1 | sKIDS round 2 | IgG,A,M ELISA |
| Child        | 9   | <b>110</b>                         | 4          | 172  | 5                    | 285       | 2         | 50                | 28273         | <b>12195</b> | 2925        | <b>87935</b> | Negative      | Negative      | Negative      |
| Child        | 5   | <b>243</b>                         | 0          | 0    | 12                   | 10        | 1         | 546               | 20067         | 1650         | 2012        | 432          | Negative      | Negative      | Negative      |
| Child        | 7   | <b>418</b>                         | 0          | 766  | 39                   | 14        | 0         | 29                | <b>31263</b>  | <b>16729</b> | 3684        | <b>18035</b> | Negative      |               | Negative      |
| Child        | 11  | <b>70</b>                          | 0          | 796  | 73                   | 225       | 2         | <b>603</b>        | 7360          | 5213         | 1263        | <b>60299</b> | Negative      | Negative      | Negative      |
| Child        | 10  | <b>142</b>                         | 0          | 230  | 40                   | 25        | 0         | 59                | 23156         | 5741         | 4402        | 8572         | Negative      | Negative      | Negative      |
| Child        | 11  | <b>274</b>                         | 0          | 276  | 127                  | 97        | 4         | 56                | <b>53420</b>  | 3992         | <b>7148</b> | <b>14452</b> |               |               | Negative      |
| Child        | 5   | <b>330</b>                         | 6          | 54   | 134                  | 171       | 3         | 241               | 12221         | 1481         | 4213        | <b>37470</b> | Negative      | Negative      | Negative      |
| Child        | 8   | <b>168</b>                         | 0          | 4    | 220                  | 47        | 2         | 43                | <b>29509</b>  | 5580         | 675         | <b>12144</b> | Negative      | Negative      | Negative      |
| Child        | 5   | <b>742</b>                         | 2          | 36   | 25                   | 37        | 1         | 93                | 6215          | 2197         | 1425        | 2828         | Negative      | Negative      | Negative      |
| Child        | 5   | <b>776</b>                         | <b>32</b>  | 16   | 42                   | 40        | 2         | 51                | 2637          | 268          | 305         | 153          | Negative      | Negative      | Negative      |
| Child        | 5   | <b>484</b>                         | 8          | 136  | 20                   | 58        | 1         | 42                | 2610          | 2239         | 1072        | 6684         | Negative      |               | Negative      |
| Child        | 7   | <b>387</b>                         | <b>24</b>  | 104  | 109                  | 36        | 1         | <b>1465</b>       | 9255          | <b>8513</b>  | 4582        | 5311         | Negative      | Negative      | Negative      |
| Staff        | 49  | <b>148</b>                         | 0          | 8    | 56                   | 323       | 5         | 51                | 43504         | 11602        | 2468        | 28990        | Negative      |               | Negative      |
| Staff        | 38  | <b>62</b>                          | 0          | 430  | 69                   | 114       | 2         | 46                | <b>106800</b> | <b>26036</b> | <b>7039</b> | <b>37074</b> | Negative      | Negative      | Negative      |
| Staff        | 43  | <b>496</b>                         | 2          | 1246 | 64                   | 132       | 0         | 299               | 30002         | 9771         | 2877        | 19008        | Negative      | Negative      | Negative      |
| Staff        |     | <b>37</b>                          | 1          | 19   | 84                   | 75        | 3         | 105               | 43170         | 3686         | 4180        | 12688        | Negative      | Negative      | Negative      |
| Staff        | 47  | <b>160</b>                         | 0          | 392  | 225                  | 136       | 7         | <b>804</b>        | 23610         | 5171         | 826         | 29936        | Negative      | Negative      | Negative      |
| Staff        | 38  | <b>1124</b>                        | 16         | 374  |                      |           |           |                   |               |              |             |              | Negative      | Negative      | Negative      |
| Staff        | 65  | <b>524</b>                         | 2          | 320  | 56                   | 39        | 1         | 150               | <b>62856</b>  | <b>25802</b> | 2758        | <b>33779</b> | Negative      | Negative      | Negative      |
| Staff        | 31  | <b>84</b>                          | 4          |      | 65                   | 55        | 2         | 278               | <b>63770</b>  | 9017         | 3795        | 24533        | Negative      |               | Negative      |
| Staff        | 52  | 6                                  | <b>32</b>  | 96   | 62                   | 64        | 12        | 60                | 30596         | 6158         | <b>5140</b> | 2549         | Negative      | Negative      | Negative      |
| Staff        | 31  | 8                                  | <b>452</b> | 64   | 33                   | 395       | 8         | 22                | 25250         | 1613         | 692         | <b>46524</b> | Negative      | Negative      | Negative      |
| Staff        | 53  | <b>428</b>                         | 2          |      | 46                   | 151       | 1         | 49                | 29970         | <b>18828</b> | <b>4699</b> | <b>35577</b> | Negative      |               | Negative      |

**Supplementary Table 2. Immune characteristics of ELISpot Responding Seronegative donors.**

**Bold** values indicate values above cut-off. **Bold-italicised** indicates values +50% higher than geometric mean.

|                  |                                      | Wuhan           |                | B.1.1.7         |                | B1.351         |                 | P.1            |                |
|------------------|--------------------------------------|-----------------|----------------|-----------------|----------------|----------------|-----------------|----------------|----------------|
|                  |                                      | Children        | Adults         | Children        | Adults         | Children       | Adults          | Children       | Adults         |
| SARS-CoV-2 Spike | Geo. Mean Titre $\pm$ SD (AU/ml)     | 13138 $\pm$ 2.1 | 6701 $\pm$ 2.1 | 11067 $\pm$ 2.0 | 6351 $\pm$ 2.1 | 6862 $\pm$ 2.1 | 3766 $\pm$ 2.3  | 8477 $\pm$ 2.1 | 4115 $\pm$ 2.0 |
|                  | Normalised Titre* Median (95%CI)     | -               | -              | 82% (75-89)     | 94% (82-109)   | 49% (46-59)    | 53% (46-73)     | 63% (59-66)    | 64% (53-74)    |
| SARS-CoV-2 RBD   | Geo. Mean Titre $\pm$ SD (AU/ml)     | 4198 $\pm$ 2.4  | 1954 $\pm$ 2.4 | 2938 $\pm$ 2.4  | 1370 $\pm$ 2.6 | 1299 $\pm$ 2.3 | 473.3 $\pm$ 2.4 | 2018 $\pm$ 2.5 | 691 $\pm$ 2.5  |
|                  | Normalised Titre* Median (95%CI)     | -               | -              | 71% (68-72)     | 72% (66-74)    | 31% (29-34)    | 27% (21-30)     | 47% (43-52)    | 39% (31-44)    |
|                  | Seropositive donors <sup>†</sup> (%) | 19/19 (100%)    | 17/18 (94%)    | 19/19 (100%)    | 16/18 (89%)    | 16/19 (84%)    | 5/18 (28%)      | 16/19 (84%)    | 8/18 (44%)     |

**Supplementary Table 3. Antibody reactivity against SARS-CoV-2 spike and RBD from variants of concern in 6+-month convalescent children and adults.** \*Relative percentage of binding to Wuhan viral protein. †seropositivity defined based on a cut-off of 600 AU/ml.

| <b>Antigen</b>                    | <b>Clone</b> | <b>Fluorophore</b> | <b>Supplier</b>         | <b>Code</b> | <b>Dilution</b> |
|-----------------------------------|--------------|--------------------|-------------------------|-------------|-----------------|
| eBioscience Fixable Viability Dye | -            | eFluor 780         | ThermoFisher Scientific | 65-0865-14  | 1/10000         |
| CD14                              | HCD14        | APC-Cy7            | Biolegend               | 325620      | 1/100           |
| CD19                              | HIB19        | APC-Cy7            | Biolegend               | 302218      | 1/100           |
| CD3                               | UCHT1        | Fitc               | Biolegend               | 300406      | 1/50            |
| CD4                               | RPAT4        | Per-CP-Cy5.5       | Biolegend               | 300529      | 1/50            |
| CD8                               | SK1          | BV510              | Biolegend               | 344732      | 1/50            |
| IL-2                              | MQ117H12     | Pe-Cy7             | Biolegend               | 500326      | 1/50            |
| IL-4                              | MP4 25D2     | APC                | Biolegend               | 500813      | 1/25            |
| IL-6                              | MQ2 13A5     | PE-Dazzle 594      | Biolegend               | 501122      | 1/20            |
| IL-10                             | Jes3-9D7     | PE                 | Biolegend               | 501404      | 1/20            |
| IL-17A                            | BL168        | BV421              | Biolegend               | 512322      | 1/20            |
| IFN- $\gamma$                     | 4S.B3        | AF700              | Biolegend               | 502520      | 1/100           |
| TNF                               | Ab11         | BV711              | Biolegend               | 502940      | 1/20            |

**Supplementary Table 4. Flow cytometry antibodies**
